# Supplementary material for: Estimating the risk of species interaction loss in mutualistic communities
Source: PLOS journal article supplement (doi:10.1371/journal.pbio.3000843), 2020-08-31

# Frequency

(a) Genus

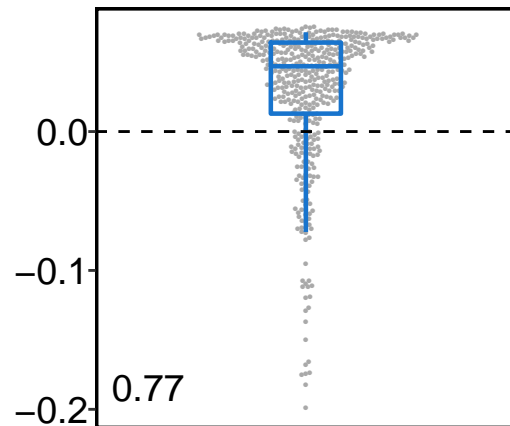

(b) Family

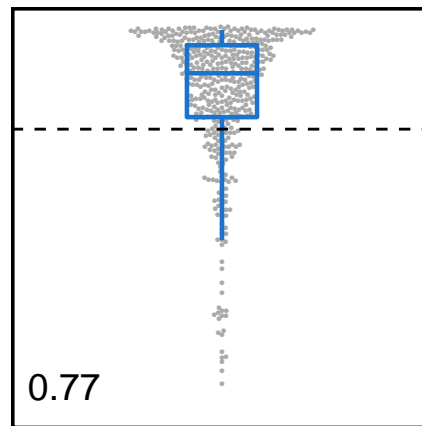

(c) Order

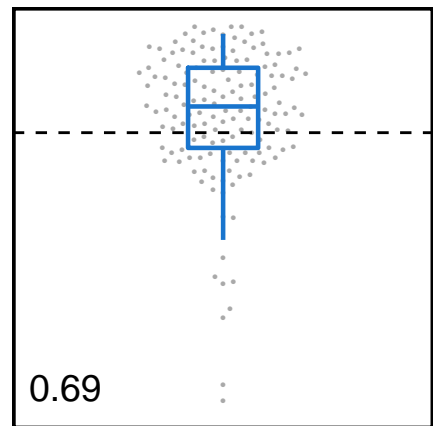

# Generalisation

(d) Genus

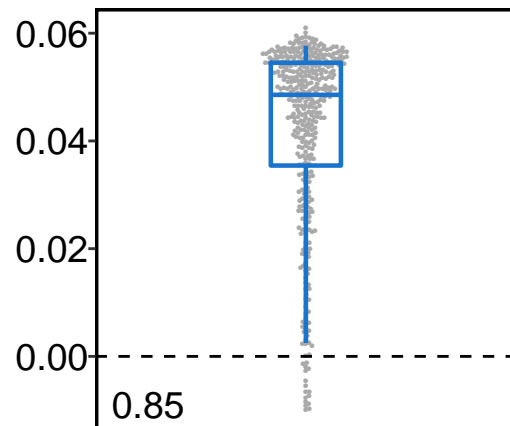

(e) Family

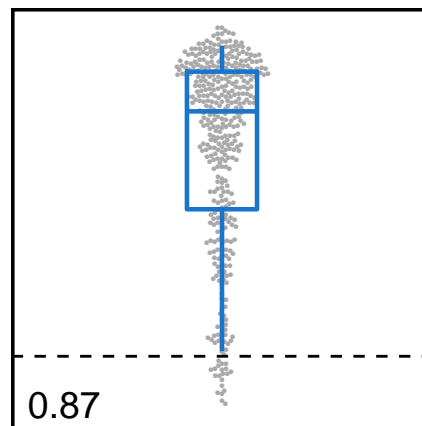

(f) Order

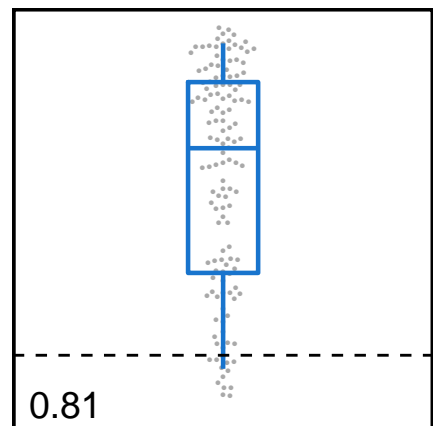

Supplement: S5 (10.1371/journal.pbio.3000843.s005) [file journal.pbio.3000843.s005]
