# Supplementary material for: Estimating the risk of species interaction loss in mutualistic communities
Source: PLOS journal article supplement (doi:10.1371/journal.pbio.3000843), 2020-08-31
Supplement: S7 (10.1371/journal.pbio.3000843.s007) [file journal.pbio.3000843.s007]

## S1 Analysis: Influence of sampling intensity on vulnerability

We calculated the sampling intensity of each network in our dataset as  $\frac{\sqrt{N}}{\sqrt{size}}$ , where  $N$  is the number of interaction events in a network and  $size$  is the product of the number of plant species and animal species in a network, following [1,2]. We then tested for a correlation between log of a network's sampling intensity and its median vulnerability. We did not find a significant relationship between log of a network's sampling intensity and its median vulnerability ( $P = 0.0503$ ). While this is approaching significance, the  $R^2$  was low (0.07) and the relationship was driven by a handful of outlier points (identified using Cook's distance with a threshold of  $4/n$ , where  $n$  is the sample size). When these were removed, the relationship was even less significant ( $P = 0.115$ ,  $R^2 = 0.04$ ).

1. Schleuning M, Fründ J, Klein AM, Abrahamczyk S, Alarcón R, Albrecht M, et al. Specialization of mutualistic interaction networks decreases toward tropical latitudes. *Curr Biol.* 2012;22: 1925–1931. doi:10.1016/j.cub.2012.08.015
2. Dalsgaard B, Schleuning M, Maruyama PK, Dehling DM, Sonne J, Vizentin-Bugoni J, et al. Opposed latitudinal patterns of network-derived and dietary specialization in avian plant–frugivore interaction systems. *Ecography.* 2017;40: 1395–1401. doi:10.1111/ecog.02604
